# Supplementary material for: COVID-19 mRNA Based Vaccine Immune-Response Assessment in Nursing Home Residents for Public Health Decision
Source: MDPI journal article supplement (doi:10.3390/vaccines9121429), 2021-12-02
Supplement: s1 [file s1]

**Supplementary Table S2. Demographic and clinical records of the non-S1 antibodies subjects after 6 months after full vaccination.**

|                             | Humoral Non-responders (n=16) | Complete Non-responders (n=34) | p-value |
|-----------------------------|-------------------------------|--------------------------------|---------|
| Age (y.o) Mean (SD)         | 84.00 (12.43)                 | 86.09 (5.63)                   | NS      |
| Female n (%)                | 11 (68.75)                    | 21 (61.76)                     | NS      |
| <b>Comorbidities n (%)</b>  |                               |                                |         |
| Hypertension                | 8 (50)                        | 15 (44.18)                     | NS      |
| Diabetes                    | 8 (50)                        | 7 (20.59)                      | 0.034   |
| Alzheimer                   | 1 (6.25)                      | 2 (5.88)                       | NS      |
| Cardiovascular disease      | 3 (18.75)                     | 6 (17.65)                      | NS      |
| Transplant recipient        | 0                             | 0                              | NA      |
| Malignancy                  | 1 (6.25)                      | 2 (5.88)                       | NS      |
| Autoimmune disorder         | 2 (12.5)                      | 3 (8.82)                       | NS      |
| Immunosuppressant treatment | 2 (12.5)                      | 1 (2.94)                       | NS      |
