# Supplementary material for: COVID-19 mRNA Based Vaccine Immune-Response Assessment in Nursing Home Residents for Public Health Decision
Source: MDPI journal article supplement (doi:10.3390/vaccines9121429), 2021-12-02
Supplement: s1 [file s1]

**Supplementary Table S1. Demographic and clinical records of the non-S1 antibodies subjects after full vaccination.**

|                             | Humoral Non-responders (n=12) | Complete Non-responders (n=12) | p-value |
|-----------------------------|-------------------------------|--------------------------------|---------|
| Age (y.o) Mean (SD)         | 85.8 (6.6)                    | 85.4 (6.0)                     | NS      |
| Female n (%)                | 9 (75)                        | 7 (58.3)                       | NS      |
| <b>Comorbidities n (%)</b>  |                               |                                |         |
| Hypertension                | 4 (33.3)                      | 6 (50)                         | NS      |
| Diabetes                    | 2 (16.7)                      | 3 (25)                         | NS      |
| Alzheimer                   | 2 (16.7)                      | 3 (25)                         | NS      |
| Cardiovascular disease      | 3 (25)                        | 0                              | NS      |
| Transplant recipient        | 0                             | 1 (8.3)                        | NS      |
| Malignancy                  | 2 (16.7)                      | 2 (16.7)                       | NS      |
| Autoimmune disorder         | 2 (16.7)                      | 1 (8.3)                        | NS      |
| Immunosuppressant treatment | 1 (8.3)                       | 3 (25)                         | NS      |
